# Supplementary material for: Association of Fecal Calprotectin With Endoscopic and Histologic Activity in Pediatric Inflammatory Bowel Disease
Source: PubMed Central journal article supplement — JPGN Rep. 2021 Oct 13;2(4):e129. doi: 10.1097/PG9.0000000000000129 (PMC10191562; doi:10.1097/pg9.0000000000000129), 2021-10-13
Supplement: pg9-2-e129-s001.pdf [file pg9-2-e129-s001.pdf]

Supplementary Table 1: Fecal calprotectin (ug/g) and endoscopic disease severity

| Disease severity | All IBD        |         | Crohn's disease |         | Ulcerative colitis |         |
|------------------|----------------|---------|-----------------|---------|--------------------|---------|
|                  | median [IQR]   | mean±SD | median [IQR]    | mean±SD | median [IQR]       | mean±SD |
| None             | 181 [45-749]   | 437±551 | 181 [21-595]    | 395±535 | 672 [94-1250]      | 672±578 |
| Mild             | 499 [242-779]  | 558±405 | 553 [262-813]   | 584±396 | 475 [237-789]      | 537±411 |
| Moderate         | 599 [244-1071] | 701±503 | 421 [243-630]   | 509±292 | 909 [299-1250]     | 878±586 |
| Severe           | 778 [462-1422] | 886±402 | 944 [448-1457]  | 945±484 | 778 [462-1422]     | 886±402 |

| Supplementary Table 2. Fecal calprotectin (ug/g) and histologic disease severity |                |         |                 |         |                    |          |
|----------------------------------------------------------------------------------|----------------|---------|-----------------|---------|--------------------|----------|
| Disease severity                                                                 | All IBD        |         | Crohn's disease |         | Ulcerative colitis |          |
|                                                                                  | median [IQR]   | mean±SD | median [IQR]    | mean±SD | median [IQR]       | mean±SD  |
| None                                                                             | 328 [116-833]  | 487±467 | 421 [194-882]   | 552±470 | 94 [30-654]        | 292±395  |
| Mild                                                                             | 399 [235-1064] | 576±459 | 371 [182, 1010] | 513±416 | 467 [237-1422]     | 665±500  |
| Moderate                                                                         | 674 [325-1250] | 769±524 | 590 [227-977]   | 629±484 | 849 [469-1250]     | 880±528  |
| Severe                                                                           | 895 [504-1434] | 952±454 | 895 [397-1429]  | 902±449 | 1206 [816-1597]    | 1207±391 |

Supplemental Table 3. Fecal Calprotectin Cut offs for inflammation in IBD

| Calprotectin (ug/g) | Sensitivity, %   | Specificity, %   | PPV, %           | NPV, %           | AUC              |
|---------------------|------------------|------------------|------------------|------------------|------------------|
| >50                 | 0.95 (0.90-0.99) | 0.23 (0.00-0.46) | 0.90 (0.84-0.96) | 0.38 (0.04-0.71) | 0.59 (0.45-0.73) |
| >100                | 0.95 (0.90-0.99) | 0.38 (0.12-0.65) | 0.92 (0.86-0.97) | 0.50 (0.19-0.81) | 0.66 (0.51-0.82) |
